# Supplementary material
Source: PubMed Central journal article supplement (PMC2197158)
Supplement: NIHMS36187-supplement-01.pdf [file NIHMS36187-supplement-01.pdf]

Molecular Cell, Volume 28

## Supplemental Data

### Structural Organization of the Anaphase-Promoting Complex

#### Bound to the Mitotic Activator Slp1

Melanie D. Ohi, Anna Feoktistova, Liping Ren, Calvin Yip, Yifan Cheng, Jun-Song Chen, Hyun-Joo Yoon, Joseph S. Wall, Zhong Haung, Pawel A. Penczek, Kathleen L. Gould, and Thomas Walz

## Supplemental Experimental Procedures

### Analysis of Lid1-TAP Purifications by Mass Spectrometry

Lid1-TAP purifications from *mts3-1* and *mts3-1 madΔ2 mad3Δ* arrested cells were subjected to trypsin digestion and MudPIT mass spectrometric analysis as described (Yoon et al., 2002). The data were searched against the *S. pombe* protein database using Sequest (Thermo Finnigan) and were then processed with the TransProteomic Pipeline program (originally developed by ISB). The sequence coverage and number of unique peptides are shown in Figure 1A, S5A, and S7A.

### Scanning Transmission EM (STEM)

STEM was carried out in the Brookhaven National Laboratory (BNL) STEM facility with tobacco mosaic virus (TMV) included as an internal control. For mass measurements, freeze-dried *S. pombe* APC/C particles were prepared by the wet film technique, as described on <http://www.biology.bnl.gov/stem/stem.html> under Specimen Preparation. Details of STEM and mass analysis are described (Wall et al., 1998; Wall and Simon, 2001). The program PCMass was used for these analyses.

### **Projection Analysis of Negatively Stained APC/C**

3,027 pairs of conventionally negatively stained APC/C particles were selected interactively from untilted images (35 images) using WEB, the display program associated with SPIDER (Frank et al., 1996), and windowed into 120 x 120 pixel images. The particles selected from the images were rotationally and translationally aligned and subjected to 10 cycles of multi-reference alignment and K-means classification specifying 20 output classes (data not shown). The references used for the first multi-reference alignment were randomly chosen from the raw images. From the class averages, two representative projections were chosen and used as references for another cycle of multi-reference alignment (data not shown). The larger of the resulting two classes (2,334 particles) is shown in Figure 1S.

## **Supplemental References**

Frank, J., Radermacher, M., Penczek, P., Zhu, J., Li, Y., Ladjadj, M., and Leith, A. (1996). SPIDER and WEB: processing and visualization of images in 3D electron microscopy and related fields. *J Struct Biol* *116*, 190-199.

Wall, J. S., Hainfeld, J. F., and Simon, M. N. (1998). Scanning transmission electron microscopy of nuclear structures. *Methods Cell Biol* *53*, 139-164.

Wall, J. S., and Simon, M. N. (2001). Scanning transmission electron microscopy of DNA-protein complexes. *Methods Mol Biol* *148*, 589-601.

Yoon, H. J., Feoktistova, A., Wolfe, B. A., Jennings, J. L., Link, A. J., and Gould, K. L. (2002). Proteomics analysis identifies new components of the fission and budding yeast anaphase-promoting complexes. *Curr Biol* *12*, 2048-2054.

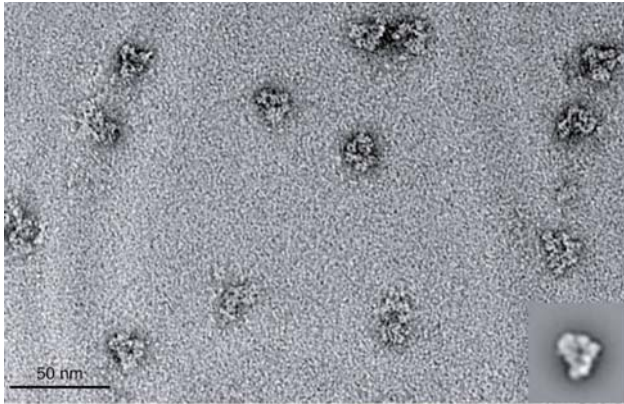

**Figure S1. *S. pombe* APC/C Complex in Negative Stain**

Negatively stained Lid1-TAP particles are structurally homogeneous as revealed by the average of 2,334 particles shown in the inset. Scale bar is 50 nm. Side length of the inset is 53.7 nm.

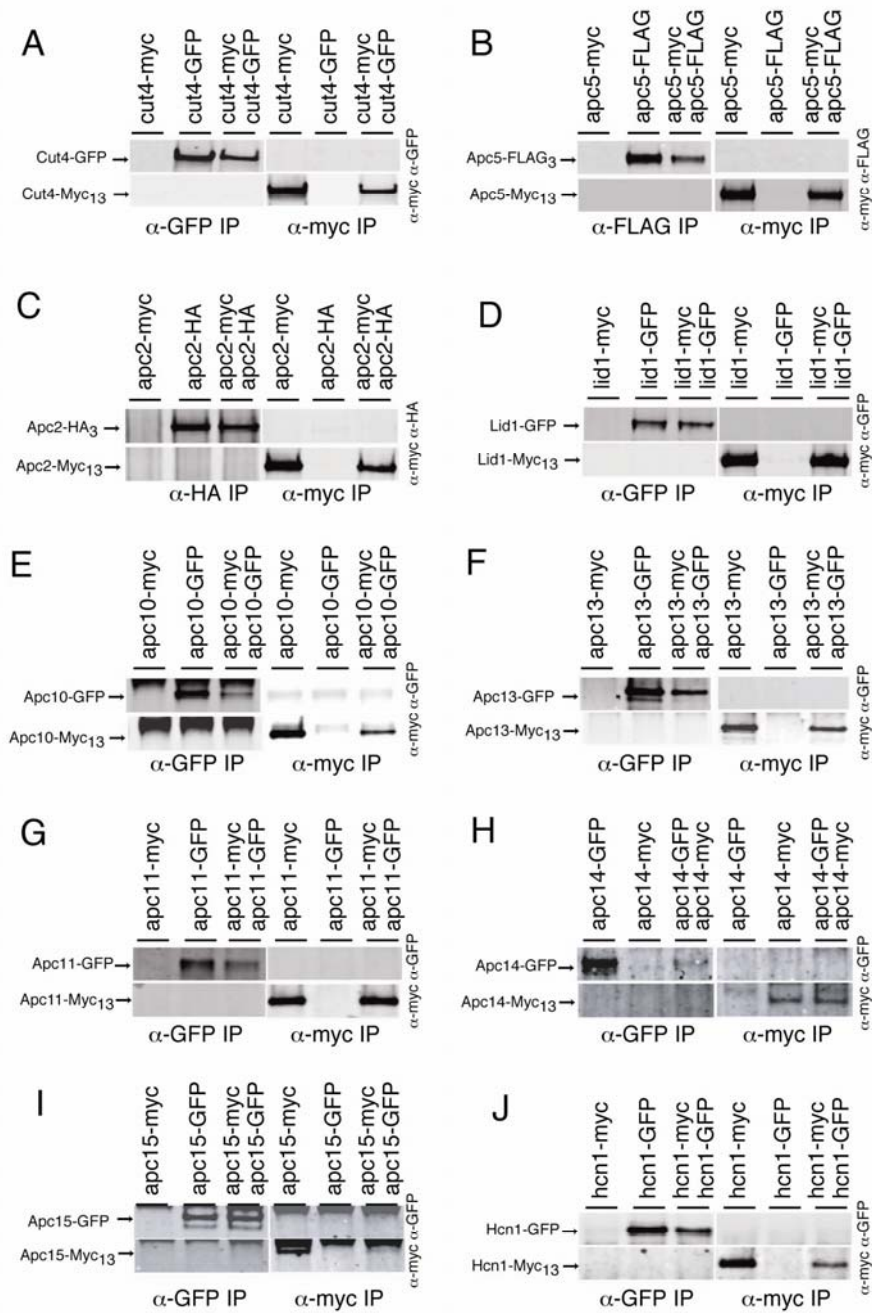

Figure S2

Figure S2. Determination of *S. pombe* APC/C Subunit Stoichiometry

Cut4, Apc5, Apc2, Lid1, Apc10, Apc13, Apc11, Apc14, Acp15, and Hcn1 do not self-associate *in vivo*.

(A) An anti-GFP (upper panel) and an anti-Myc (lower panel) immunoblot of immunoprecipitates from *cut4-GFP*, *cut4-Myc<sub>13</sub>*, and *cut4-GFP cut4-Myc<sub>13</sub>* strains.

Immunoprecipitations were performed with anti-GFP or anti-Myc antibodies.

(B) An anti-FLAG (upper panel) and an anti-Myc (lower panel) immunoblot of immunoprecipitates from *apc5-Myc<sub>13</sub>*, *apc5-flag<sub>3</sub>*, and *apc5-Myc<sub>13</sub> apc5-flag<sub>3</sub>* strains.

Immunoprecipitations were performed with anti-FLAG or anti-Myc antibodies.

(C) An anti-HA (upper panel) and an anti-Myc (lower panel) immunoblot of immunoprecipitates from *apc2-Myc<sub>13</sub>*, *apc2-HA<sub>3</sub>*, and *apc2-Myc<sub>13</sub> apc2-HA<sub>3</sub>* strains.

Immunoprecipitations were performed with anti-HA or anti-Myc antibodies.

(D) An anti-GFP (upper panel) and an anti-Myc (lower panel) immunoblot of immunoprecipitates from *lid1-GFP*, *lid1-Myc<sub>13</sub>*, and *lid1-GFP lid1-Myc<sub>13</sub>* strains.

Immunoprecipitations were performed with anti-GFP or anti-Myc antibodies.

(E) An anti-GFP (upper panel) and an anti-Myc (lower panel) immunoblot of immunoprecipitates from *apc10-GFP*, *apc10-Myc<sub>13</sub>*, and *apc10-GFP apc10-Myc<sub>13</sub>* strains. Immunoprecipitations were performed with anti-GFP or anti-Myc antibodies.

(F) An anti-GFP (upper panel) and an anti-Myc (lower panel) immunoblot of immunoprecipitates from *apc13-GFP*, *apc13-Myc<sub>13</sub>*, and *apc13-GFP apc13-Myc<sub>13</sub>* strains. Immunoprecipitations were performed with anti-GFP or anti-Myc antibodies.

(G) An anti-GFP (upper panel) and an anti-Myc (lower panel) immunoblot of immunoprecipitates from *apc11-GFP*, *apc11-Myc<sub>13</sub>*, and *apc11-GFP apc11-Myc<sub>13</sub>* strains. Immunoprecipitations were performed with anti-GFP or anti-Myc antibodies.

(H) An anti-GFP (upper panel) and an anti-Myc (lower panel) immunoblot of immunoprecipitates from *apc14-GFP*, *apc14-Myc<sub>13</sub>*, and *apc14-GFP apc14-Myc<sub>13</sub>* strains. Immunoprecipitations were performed with anti-GFP or anti-Myc antibodies.

(I) An anti-GFP (upper panel) and an anti-Myc (lower panel) immunoblot of immunoprecipitates from *apc15-GFP*, *apc15-Myc<sub>13</sub>*, and *apc15-GFP apc15-Myc<sub>13</sub>* strains. Immunoprecipitations were performed with anti-GFP or anti-Myc antibodies.

(J) An anti-GFP (upper panel) and an anti-Myc (lower panel) immunoblot of immunoprecipitates from *hcn1-GFP*, *hcn1-Myc<sub>13</sub>*, and *hcn1-GFP hcn1-Myc<sub>13</sub>* strains. Immunoprecipitations were performed with anti-GFP or anti-Myc antibodies.

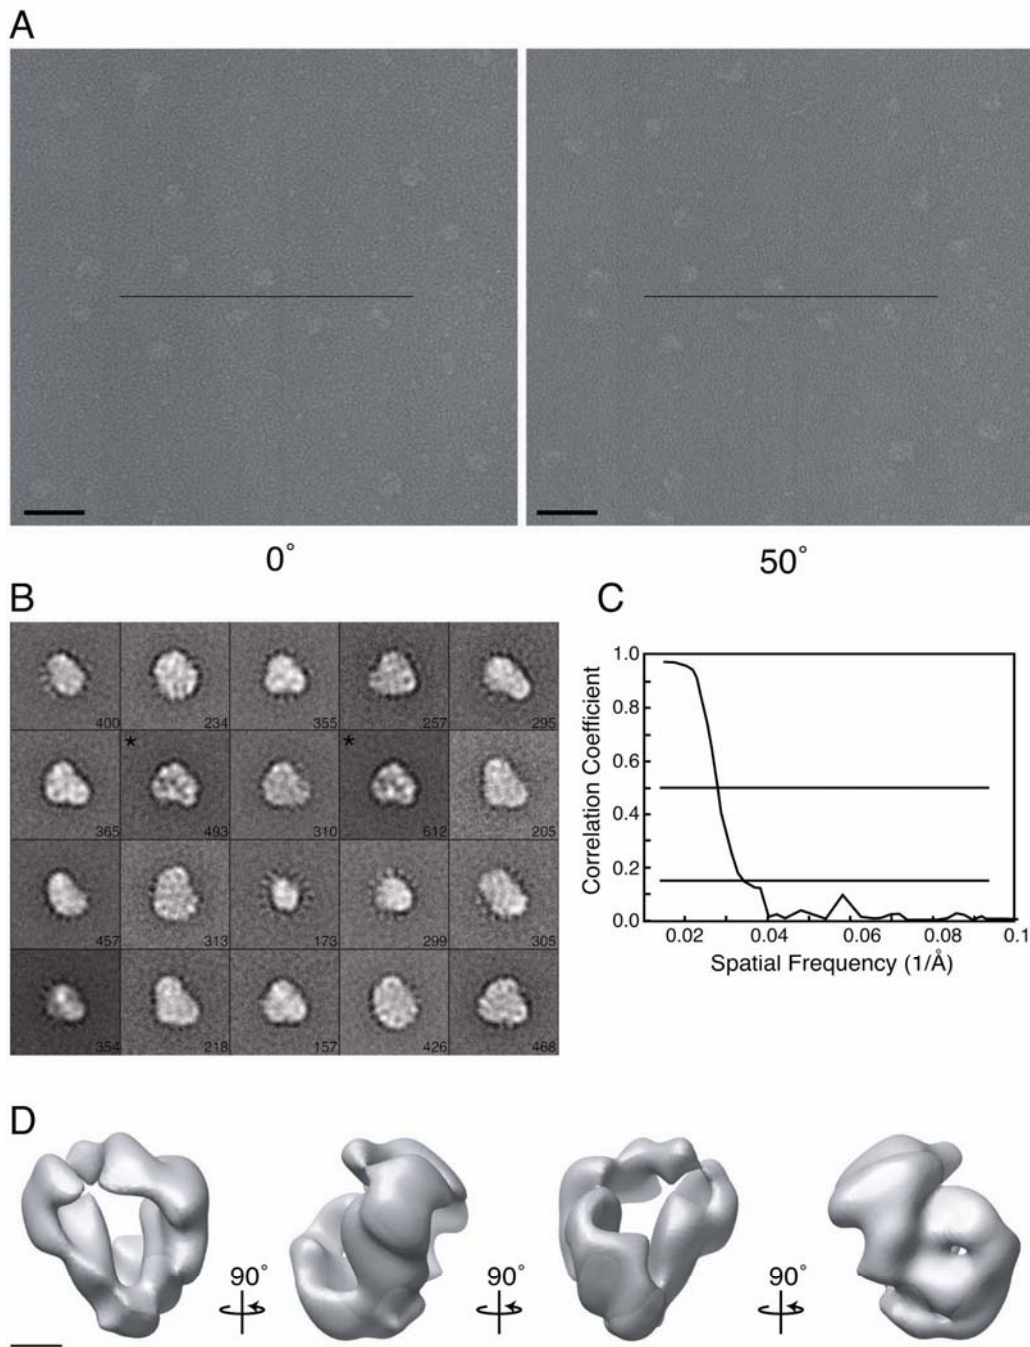

Figure S3

Figure S3. *S. pombe* APC/C in Cryonegative Stain



(A) Areas of typical electron micrographs of APC/C particles at 0° and 50° tilt prepared by cryo-negative staining. Line indicates tilt axis. Scale bar is 50 nm.

(B) Class averages obtained by multi-reference alignment and classification of 6,696 APC/C particle images into 20 classes. The number of particles in each projection average is shown in the lower right corner of each average. The two averages that were combined and used for 3D reconstruction are marked with a “\*” in the upper left corner. Side length of individual panels is 50.4 nm.

(C) Fourier shell correlation (FSC) was used to estimate the resolution of the density map. The resolution is 36 Å at the FSC = 0.5 cut-off.

(D) 3D reconstruction of the APC/C in cryo-negative stain. A high threshold level was chosen for contouring to enhance the features present in the density map.

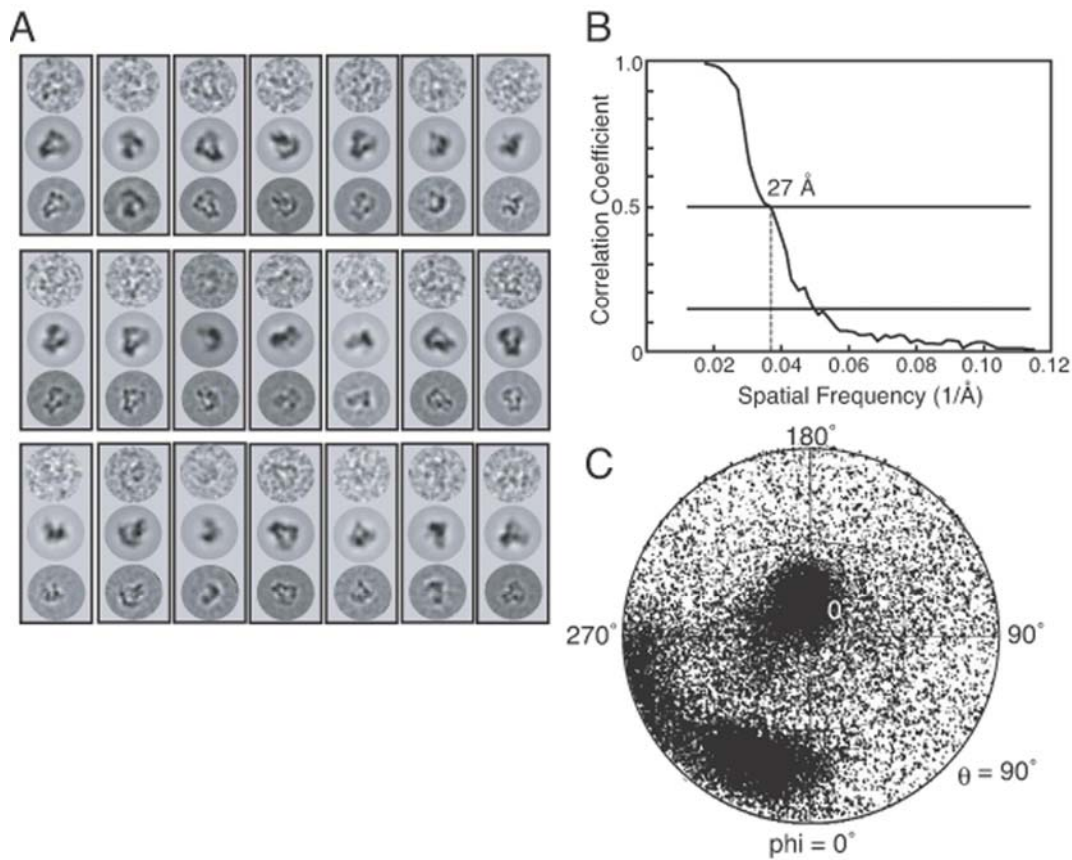

**Figure S4. Image Analysis of the Vitrified *S. pombe* APC/C**

(A) Selected raw particle images of the APC/C aligned with their best correlating reprojections of the density map shown in Figure 3 and with their respective class averages. Top panel: raw images; middle panel: reprojections from the 3D map (see Fig. 3); bottom panel: class averages. Each class average contains about 300 particles. Side length of panels is 50.4 nm.

(B) The resolution is 27.0 Å at a 0.5 cut-off. (C) Plot of the Euler angles for all the particles (28,540 particles) included in the 3D reconstruction, showing the orientations of the particles in the vitrified ice layer.

A

|       | <i>lid1-TAP cut4-2xmyc</i> | <i>lid1-TAP apc2-2xmyc</i> | <i>lid1-TAP nuc2-2xmyc</i> | <i>apc13-TAP lid1-2xmyc</i> | <i>lid1-TAP apc5-2xmyc</i> | <i>lid1-TAP cut9-2xmyc</i> | <i>lid1-TAP cut23-2xmyc</i> | <i>lid1-TAP hcn1-2xmyc</i> | <i>lid1-TAP apc14-2xmyc</i> | <i>lid1-TAP apc15-2xmyc</i> |
|-------|----------------------------|----------------------------|----------------------------|-----------------------------|----------------------------|----------------------------|-----------------------------|----------------------------|-----------------------------|-----------------------------|
| Cut4  | 53.1                       | 30.8                       | 58.7                       | 32.2                        | 53.5                       | 55.2                       | 59.4                        | 56.0                       | 58.0                        | 33.1                        |
| Apc2  | 68.7                       | 27.9                       | 73.7                       | 37.6                        | 62.1                       | 62.0                       | 70.0                        | 69.0                       | 72.5                        | 34.1                        |
| Nuc2  | 74.0                       | 46.0                       | 81.7                       | 34.3                        | 69.3                       | 65.7                       | 76.8                        | 81.1                       | 75.9                        | 45.9                        |
| Lid1  | 54.8                       | 27.0                       | 64.3                       | 34.1                        | 54.9                       | 50.9                       | 59.0                        | 55.2                       | 64.0                        | 31.0                        |
| Apc5  | 63.5                       | 30.9                       | 71.6                       | 37.7                        | 63.5                       | 67.3                       | 70.6                        | 68.8                       | 71.9                        | 31.2                        |
| Cut9  | 65.6                       | 42.8                       | 74.5                       | 47.2                        | 62.6                       | 58.9                       | 73.0                        | 79.4                       | 73.0                        | 34.6                        |
| Cut23 | 66.2                       | 38.2                       | 73.5                       | 42.1                        | 63.2                       | 63.5                       | 71.0                        | 58.4                       | 64.6                        | 48.7                        |
| Apc10 | 48.1                       | 24.9                       | 85.2                       | 35.4                        | 61.4                       | 61.4                       | 85.7                        | 68.8                       | 79.4                        | 41.3                        |
| Apc11 | 25.5                       | 25.5                       | 71.3                       | 25.5                        | 71.3                       | 71.3                       | 71.3                        | 39.4                       | 71.3                        | 25.5                        |
| Hcn1  | 95.0                       | 78.8                       | 81.3                       | 90.0                        | 81.3                       | 81.3                       | 81.3                        | 53.8                       | 81.3                        | 81.3                        |
| Apc13 | 43.7                       | 24.4                       | 85.2                       | 45.9                        | 77.8                       | 62.2                       | 80.0                        | 73.3                       | 73.3                        | 34.8                        |
| Apc14 | 71.0                       | 50.5                       | 78.5                       | 53.3                        | 89.7                       | 86.9                       | 89.7                        | 69.2                       | 57.9                        | 35.5                        |
| Apc15 | 28.7                       | 16.2                       | 28.7                       | 22.1                        | 28.7                       | 28.7                       | 28.7                        | 28.7                       | 28.7                        | 19.1                        |
| Slp1  | 65.6                       | 15.0                       | 71.1                       | 24.8                        | 69.3                       | 49.0                       | 71.3                        | 54.3                       | 75.0                        | 20.9                        |

B

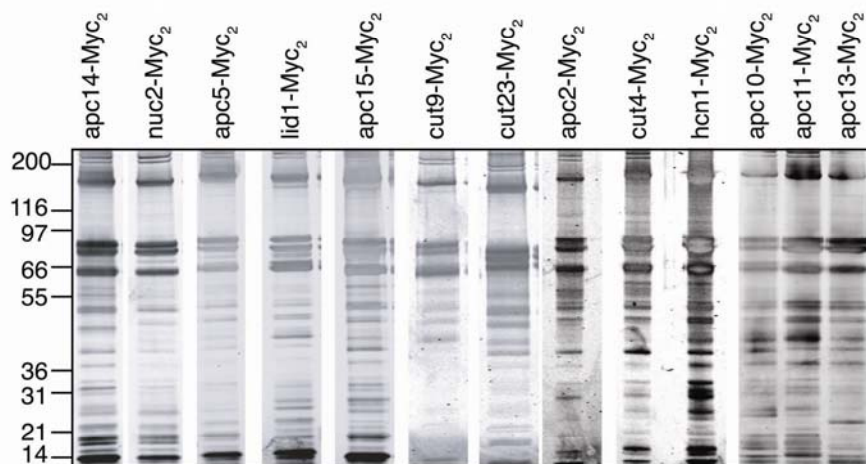

**Figure S5. Composition of *S. pombe* APC/C Preparations Used in Antibody Labeling Experiments**

(A) TAP/mass spectrometric results from APC/C particles that contain a Myc<sub>2</sub> epitope tagged copy of Cut4, Apc2, Nuc2, Lid1, Apc5, Cut9, Cut23, Hcn1, Apc14, or Apc15. Numbers represent the percent sequence coverage for each protein.

(B) Silver-stained gels of a portion of the Lid1-TAP or Apc13-TAP complexes that contain a Myc<sub>2</sub> epitope tagged copy of Apc14, Nuc2, Apc5, Lid1, Apc15, Cut9, Cut23, Apc2, Cut4, Hcn1, Apc10, Apc11, or Apc13.

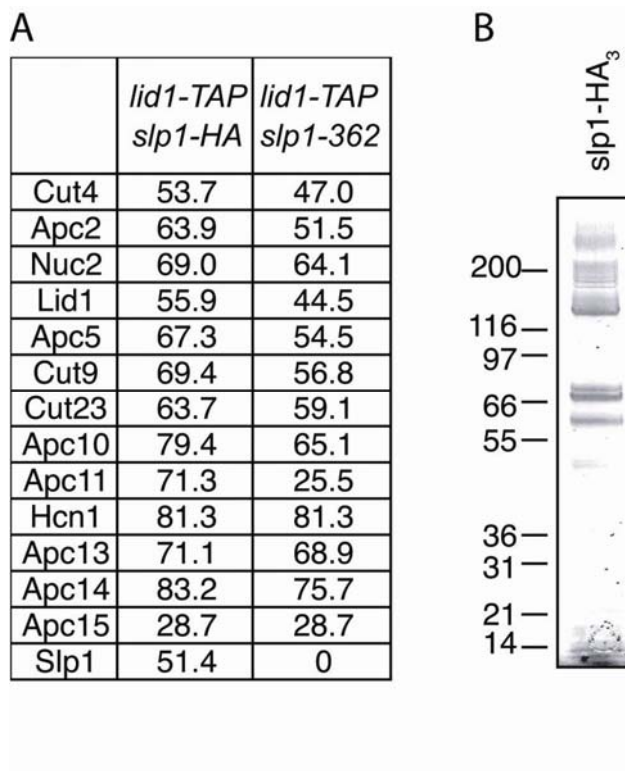

**Figure S6. Composition of the *S. pombe* APC/C Purifications Used to Localize Slp1**

(A) TAP/mass spectrometric results from APC/C particles that either contain a HA<sub>3</sub> epitope tagged copy of Slp1 or were purified from *slp1-362* cells. Numbers represent the percent sequence coverage for each protein.

(B) Silver-stained gel of a portion of the APC/C that contains a HA<sub>3</sub> epitope tagged copy of Slp1.

**Table S1. *S. pombe* Strains Used in This Study**

| <b>Strain</b> | <b>Genotype</b>                                                                                                                                                           | <b>Source</b> |
|---------------|---------------------------------------------------------------------------------------------------------------------------------------------------------------------------|---------------|
| KGY24         | <i>apc2-HA<sub>3</sub>::Kan<sup>R</sup> ade6-M210 ura4-D18 leu1-32 h<sup>-</sup></i>                                                                                      | Lab stock     |
| KGY33         | <i>cut23-myc<sub>13</sub>::Kan<sup>R</sup> ade6-M210 ura4-D18 leu1-32 h<sup>-</sup></i>                                                                                   | Lab stock     |
| KGY48         | <i>apc10-myc<sub>13</sub>::Kan<sup>R</sup> ade6-M210 ura4-D18 leu1-32 h<sup>-</sup></i>                                                                                   | Lab stock     |
| KGY51         | <i>cut4-myc<sub>13</sub>::Kan<sup>R</sup> ade6-M210 ura4-D18 leu1-32 h<sup>-</sup></i>                                                                                    | Lab stock     |
| KGY88         | <i>apc11-myc<sub>13</sub>::Kan<sup>R</sup> ade6-M210 ura4-D18 leu1-32 h<sup>-</sup></i>                                                                                   | Lab stock     |
| KGY246        | <i>ade6-M210 ura4-D18 leu1-32 h<sup>-</sup></i>                                                                                                                           | Lab stock     |
| KGY1533       | <i>apc14-myc<sub>13</sub>::Kan<sup>R</sup> ade6-M210 ura4-D18 leu1-32 h<sup>+</sup></i>                                                                                   | Lab stock     |
| KGY1549       | <i>hcn1-GFP::Kan<sup>R</sup>/hcn1-myc<sub>13</sub>::Kan<sup>R</sup> ade6-M210/ade6-M216<br/>ura4-D18/ura4-D18 leu1-32/leu1-32 h<sup>-</sup>/h<sup>+</sup></i>             | Lab stock     |
| KGY1560       | <i>lid1-TAP::Kan<sup>R</sup> apc2-myc<sub>2</sub>::Kan<sup>R</sup> mts3-1 ade6-M210<br/>ura4-D18 leu1-32 h<sup>+</sup></i>                                                | This study    |
| KGY1886       | <i>hcn1-GFP::Kan<sup>R</sup> ade6-M210 ura4-D18 leu1-32 h<sup>-</sup></i>                                                                                                 | Lab stock     |
| KGY2049       | <i>lid1-GFP::Kan<sup>R</sup> ade6-M210 ura4-D18 leu1-32 h<sup>-</sup></i>                                                                                                 | Lab stock     |
| KGY2050       | <i>lid1-TAP::Kan<sup>R</sup> mts3-1 mad2::ura4<sup>+</sup> mad3::ura4<sup>+</sup><br/>ade6-M210 ura4-D18 leu1-32 h<sup>-</sup></i>                                        | This study    |
| KGY2303       | <i>lid1-TAP::Kan<sup>R</sup> apc10-myc<sub>2</sub>::Kan<sup>R</sup> mts3-1 ura4-D18<br/>leu1-32 h<sup>-</sup></i>                                                         | This study    |
| KGY3399       | <i>hcn1- myc<sub>13</sub>::Kan<sup>R</sup> ade6-M210 ura4-D18 leu1-32 h<sup>-</sup></i>                                                                                   | Lab stock     |
| KGY3404       | <i>nuc2-HA<sub>3</sub>::Kan<sup>R</sup> ade6-M210 ura4-D18 leu1-32 h<sup>-</sup></i>                                                                                      | Lab stock     |
| KGY3654       | <i>lid1-TAP::Kan<sup>R</sup> mts3-1 ura4-D18 leu1-32 h<sup>-</sup></i>                                                                                                    | This study    |
| KGY3751       | <i>apc15-myc<sub>13</sub>::Kan<sup>R</sup> ade6-M210 ura4-D18 leu1-32 h<sup>+</sup></i>                                                                                   | Lab stock     |
| KGY3862       | <i>apc13-GFP::Kan<sup>R</sup> ade6-M210 ura4-D18 leu1-32 h<sup>-</sup></i>                                                                                                | Lab stock     |
| KGY3978       | <i>lid1-TAP::Kan<sup>R</sup> nuc2-myc<sub>2</sub>::Kan<sup>R</sup> mts3-1 ura4-D18<br/>leu1-32 h<sup>-</sup></i>                                                          | This study    |
| KGY4353       | <i>lid1-TAP::Kan<sup>R</sup> slp1-HA<sub>3</sub>::Kan<sup>R</sup> mts3-1 ade6-M210<br/>ura4-D18 leu1-32 h<sup>-</sup></i>                                                 | This study    |
| KGY4875       | <i>lid1-TAP::Kan<sup>R</sup> apc11-myc<sub>2</sub>::Kan<sup>R</sup> mts3-1 ade6-M210<br/>ura4-D18 leu1-32 mad2::ura4<sup>+</sup> mad3::ura4<sup>+</sup> h<sup>-</sup></i> | This study    |
| KGY4879       | <i>lid1-TAP::Kan<sup>R</sup> apc13-myc<sub>2</sub>::Kan<sup>R</sup> mts3-1 ade6-M210<br/>ura4-D18 leu1-32 mad2::ura4<sup>+</sup> mad3::ura4<sup>+</sup> h<sup>+</sup></i> | This study    |
| KGY5396       | <i>lid1-TAP::Kan<sup>R</sup> mts3-1 cut9-HA<sub>3</sub>::Kan<sup>R</sup> ade6-M210<br/>ura4-D18 leu1-32 mad2::ura4<sup>+</sup> mad3::ura4<sup>+</sup> h<sup>-</sup></i>   | This study    |
| KGY5397       | <i>lid1-TAP::Kan<sup>R</sup> mts3-1 cut9-HA<sub>3</sub>::Kan<sup>R</sup> ura4-D18<br/>leu1-32 h<sup>-</sup></i>                                                           | This study    |
| KGY5934       | <i>lid1-TAP::Kan<sup>R</sup> cut4-myc<sub>2</sub>::Kan<sup>R</sup> mts3-1 ura4-D18<br/>leu1-32 h<sup>+</sup></i>                                                          | This study    |
| KGY6011       | <i>lid1-TAP::Kan<sup>R</sup> hcn1-myc<sub>2</sub>::Kan<sup>R</sup> mts3-1 ade6-M210<br/>ura4-D18 leu1-32 h<sup>-</sup></i>                                                | This study    |
| KGY6086       | <i>apc2-myc<sub>13</sub>::Kan<sup>R</sup> ade6-M216 ura4-D18 leu1-32 h<sup>+</sup></i>                                                                                    | This study    |
| KGY6087       | <i>apc10-GFP::Kan<sup>R</sup> ade6-M216 ura4-D18 leu1-32 h<sup>+</sup></i>                                                                                                | This study    |

|         |                                                                                                                                                                        |            |
|---------|------------------------------------------------------------------------------------------------------------------------------------------------------------------------|------------|
| KGY6088 | <i>apc11-GFP::Kan<sup>R</sup> ade6-M216 ura4-D18 leu1-32 h<sup>+</sup></i>                                                                                             | This study |
| KGY6089 | <i>apc13-myc<sub>13</sub>::Kan<sup>R</sup> ade6-M216 ura4-D18 leu1-32 h<sup>+</sup></i>                                                                                | This study |
| KGY6090 | <i>cut4-GFP::Kan<sup>R</sup> ade6-M216 ura4-D18 leu1-32 h<sup>+</sup></i>                                                                                              | This study |
| KGY6096 | <i>apc2-HA<sub>3</sub>::Kan<sup>R</sup>/apc2-myc<sub>13</sub>::Kan<sup>R</sup> ade6-M210/ade6-M216 ura4-D18/ura4-D18 leu1-32/leu1-32 h<sup>-</sup>/h<sup>+</sup></i>   | This study |
| KGY6097 | <i>lid1-GFP::Kan<sup>R</sup>/lid1-myc<sub>13</sub>::Kan<sup>R</sup> ade6-M210/ade6-M216 ura4-D18/ura4-D18 leu1-32/leu1-32 h<sup>-</sup>/h<sup>+</sup></i>              | This study |
| KGY6098 | <i>apc13-GFP::Kan<sup>R</sup>/apc13-myc<sub>13</sub>::Kan<sup>R</sup> ade6-M210/ade6-M216 ura4-D18/ura4-D18 leu1-32/leu1-32 h<sup>-</sup>/h<sup>+</sup></i>            | This study |
| KGY6099 | <i>apc10-myc<sub>13</sub>::Kan<sup>R</sup>/apc10-GFP::Kan<sup>R</sup> ade6-M210/ade6-M216 ura4-D18/ura4-D18 leu1-32/leu1-32 h<sup>-</sup>/h<sup>+</sup></i>            | This study |
| KGY6100 | <i>cut4-myc<sub>13</sub>::Kan<sup>R</sup>/cut4-GFP::Kan<sup>R</sup> ade6-M210/ade6-M216 ura4-D18/ura4-D18 leu1-32/leu1-32 h<sup>-</sup>/h<sup>+</sup></i>              | This study |
| KGY6101 | <i>apc11-myc<sub>13</sub>::Kan<sup>R</sup>/apc11-GFP::Kan<sup>R</sup> ade6-M210/ade6-M216 ura4-D18/ura4-D18 leu1-32/leu1-32 h<sup>-</sup>/h<sup>+</sup></i>            | This study |
| KGY6145 | <i>lid1-myc<sub>13</sub>::Kan<sup>R</sup> ade6-M216 ura4-D18 leu1-32 h<sup>+</sup></i>                                                                                 | This study |
| KGY6178 | <i>cut9-GFP::Kan<sup>R</sup> ade6-M210 ura4-D18 leu1-32 h<sup>-</sup></i>                                                                                              | This study |
| KGY6179 | <i>cut9-flag<sub>3</sub>::Kan<sup>R</sup> ade6-M216 ura4-D18 leu1-32 h<sup>+</sup></i>                                                                                 | This study |
| KGY6181 | <i>cut23-GFP::Kan<sup>R</sup> ade6-M216 ura4-D18 leu1-32 h<sup>+</sup></i>                                                                                             | This study |
| KGY6189 | <i>cut9-GFP::Kan<sup>R</sup>/cut9-flag<sub>3</sub>::Kan<sup>R</sup> ade6-M210/ade6-M216 ura4-D18/ura4-D18 leu1-32/leu1-32 h<sup>-</sup>/h<sup>+</sup></i>              | This study |
| KGY6191 | <i>cut23-myc<sub>13</sub>::Kan<sup>R</sup>/cut23-GFP::Kan<sup>R</sup> ade6-M210/ade6-M216 ura4-D18/ura4-D18 leu1-32/leu1-32 h<sup>-</sup>/h<sup>+</sup></i>            | This study |
| KGY6204 | <i>lid1-TAP::Kan<sup>R</sup> cut23-myc<sub>2</sub>::Kan<sup>R</sup> mts3-1 ade6-M210 ura4-D18 leu1-32 h<sup>-</sup></i>                                                | This study |
| KGY6205 | <i>lid1-TAP::Kan<sup>R</sup> cut9-myc<sub>2</sub>::Kan<sup>R</sup> mts3-1 ura4-D18 leu1-32 h<sup>+</sup></i>                                                           | This study |
| KGY6232 | <i>apc5-flag<sub>3</sub>::Kan<sup>R</sup> ade6-M210 ura4-D18 leu1-32 h<sup>-</sup></i>                                                                                 | This study |
| KGY6293 | <i>lid1-TAP::Kan<sup>R</sup> slp1-362 mts3-1 ade6-M210 ura4-D18 leu1-32 h<sup>-</sup></i>                                                                              | This study |
| KGY6294 | <i>apc13-TAP::Kan<sup>R</sup> lid1-myc<sub>2</sub>::Kan<sup>R</sup> mts3-1 leu1-32 h<sup>-</sup></i>                                                                   | This study |
| KGY6300 | <i>nuc2-myc<sub>13</sub>::Kan<sup>R</sup> ade6-M216 ura4-D18 leu1-32 h<sup>+</sup></i>                                                                                 | This study |
| KGY6315 | <i>lid1-TAP::Kan<sup>R</sup> apc15-myc<sub>2</sub>::Kan<sup>R</sup> mts3-1 ade6-M210 ura4-D18 leu1-32 h<sup>-</sup></i>                                                | This study |
| KGY6316 | <i>lid1-TAP::Kan<sup>R</sup> apc5-myc<sub>2</sub>::Kan<sup>R</sup> mts3-1 ade6-M210 ura4-D18 leu1-32 h<sup>-</sup></i>                                                 | This study |
| KGY6322 | <i>apc15-GFP::Kan<sup>R</sup> ade6-M216 ura4-D18 leu1-32 h<sup>-</sup></i>                                                                                             | This study |
| KGY6331 | <i>apc5-flag<sub>3</sub>::Kan<sup>R</sup>/apc5-myc<sub>13</sub>::Kan<sup>R</sup> ade6-M210/ade6-M216 ura4-D18/ura4-D18 leu1-32/leu1-32 h<sup>-</sup>/h<sup>+</sup></i> | This study |
| KGY6333 | <i>apc15-myc<sub>13</sub>::Kan<sup>R</sup>/apc15-GFP::Kan<sup>R</sup> ade6-M210/ade6-M216 ura4-D18/ura4-D18 leu1-32/leu1-32 h<sup>-</sup>/h<sup>+</sup></i>            | This study |
| KGY6334 | <i>apc5-myc<sub>13</sub>::Kan<sup>R</sup> ade6-M216 ura4-D18 leu1-32 h<sup>+</sup></i>                                                                                 | This study |
| KGY6336 | <i>nuc2-HA<sub>3</sub>::Kan<sup>R</sup>/nuc2-myc<sub>13</sub>::Kan<sup>R</sup> ade6-M210/ade6-M216 ura4-D18/ura4-D18 leu1-32/leu1-32 h<sup>-</sup>/h<sup>+</sup></i>   | This study |
| KGY6386 | <i>apc14-myc<sub>13</sub>::Kan<sup>R</sup>/apc14-HA<sub>3</sub>::Kan<sup>R</sup> ade6-M210/ade6-M216 ura4-D18/ura4-D18 leu1-32/leu1-32 h<sup>-</sup>/h<sup>+</sup></i> | This study |

|         |                                                                                                                                                                              |            |
|---------|------------------------------------------------------------------------------------------------------------------------------------------------------------------------------|------------|
| KGY6388 | <i>apc14-HA<sub>3</sub>::Kan<sup>R</sup> ade6-M216 ura4-D18 leu1-32 h<sup>-</sup></i>                                                                                        | This study |
| KGY6389 | <i>lid1-myc<sub>13</sub>:: Kan<sup>R</sup> cut4- flag<sub>3</sub>::Kan<sup>R</sup> cut9- flag<sub>3</sub>::Kan<sup>R</sup><br/>ade6-M210 leu1-32 h<sup>+</sup></i>           | This study |
| KGY6390 | <i>lid1-myc<sub>13</sub>:: Kan<sup>R</sup> cut4- flag<sub>3</sub>::Kan<sup>R</sup> cut23- flag<sub>3</sub>::Kan<sup>R</sup><br/>ade6-M210 ura4-D18 leu1-32 h<sup>-</sup></i> | This study |
| KGY6391 | <i>lid1-myc<sub>13</sub>:: Kan<sup>R</sup> cut4- flag<sub>3</sub>::Kan<sup>R</sup> apc5- flag<sub>3</sub>::Kan<sup>R</sup><br/>ade6-M210 ura4-D18 leu1-32 h<sup>+</sup></i>  | This study |
| KGY6445 | <i>lid1-GFP::Kan<sup>R</sup> cut4- myc<sub>13</sub>::Kan<sup>R</sup> nuc2- myc<sub>13</sub>::Kan<sup>R</sup><br/>ade6-M210 ura4-D18 leu1-32 h<sup>+</sup></i>                | This study |
